# Supplementary material for: A Yeast RNA-Interference Pesticide Targeting the Irx Gene Functions as a Broad-Based Mosquito Larvicide and Adulticide
Source: Insects. 2021 Nov 2;12(11):986. doi: 10.3390/insects12110986 (PMC8622680; doi:10.3390/insects12110986)
Supplement: Supplementary file 1 [file insects-12-00986-s001.zip › insects-1438033-supplementary.pdf]

## Supplementary Material

**Table S1.** The *Irx.447* target site conserved in mosquitoes was not found in non-mosquito genomes.

| Species/Taxon Group              | Gene/Contig  |
|----------------------------------|--------------|
| <i>Aedes aegypti</i> *           | AAEL007505   |
| <i>Aedes albopictus</i>          | AALF026228   |
| <i>Anopheles albimanus</i>       | AALB016292   |
| <i>Anopheles arabiensis</i>      | AARA016724   |
| <i>Anopheles atroparvus</i>      | AatrE3_2L    |
| <i>Anopheles coluzzii</i>        | ACON005010   |
| <i>Anopheles culicifacies</i>    | KI423683     |
| <i>Anopheles darlingi</i>        | ADMH02001638 |
| <i>Anopheles dirus</i>           | ADIR015668   |
| <i>Anopheles epiroticus</i>      | KB672242     |
| <i>Anopheles farauti</i>         | KI915044     |
| <i>Anopheles funestus</i>        | AFUN016038   |
| <i>Anopheles gambiae</i>         | AGAP005010   |
| <i>Anopheles maculatus</i>       | AMAM012126   |
| <i>Anopheles melas</i>           | AXCO02001637 |
| <i>Anopheles merus</i>           | AMEM019330   |
| <i>Anopheles minimus</i>         | AMIN011495   |
| <i>Anopheles quadriannulatus</i> | AQUA016748   |
| <i>Anopheles sinensis</i>        | KE525340     |
| <i>Anopheles stephensi</i>       | ASTEI09300   |
| <i>Culex pipiens pallens</i>     | LOC120426920 |
| <i>Culex quinquefasciatus</i>    | CPIJ000125   |
| Amphibians                       | None         |
| Arthropods (non-mosquito)        | None         |
| Birds                            | None         |
| Fish                             | None         |
| Fungi                            | None         |
| Human                            | None         |
| Mammals                          | None         |
| Plants                           | None         |
| Reptiles                         | None         |

\* The *Irx.447* target site is identically conserved in multiple disease vector mosquito *Irx* genes, but this identical 21 bp target site was not detected in the genomes of non-target species in the National Center Biotechnology Information (NCBI) database [47].

**Table S2.** Mosquito ATSB feeding rates observed in laboratory simulated field trials.

|            | Species                       | Feeding rate (%) |                | n/treatment |
|------------|-------------------------------|------------------|----------------|-------------|
|            |                               | Control          | <i>Irx.447</i> |             |
| siRNA/ATSB | <i>Aedes aegypti</i> *        | 57 ± 7           | 63 ± 12        | 68          |
| yeast/ATSB | <i>Aedes aegypti</i>          | 100 ± 0          | 100 ± 0        | 150         |
|            | <i>Anopheles gambiae</i>      | 100 ± 0          | 100 ± 0        | 75          |
|            | <i>Culex quinquefasciatus</i> | 100 ± 0          | 100 ± 0        | 225         |
|            | <i>Aedes albopictus</i>       | 87 ± 0.5         | 87 ± 2         | 225         |

\* The percentages of total insects that took sugar meals including each of the indicated treatments are shown. The species of mosquito, feeding rates with SEMs, as well as the n number of individuals receiving each treatment are shown. No significant differences

between feeding rates for the insecticidal or control treatments were identified (Student's t-test).

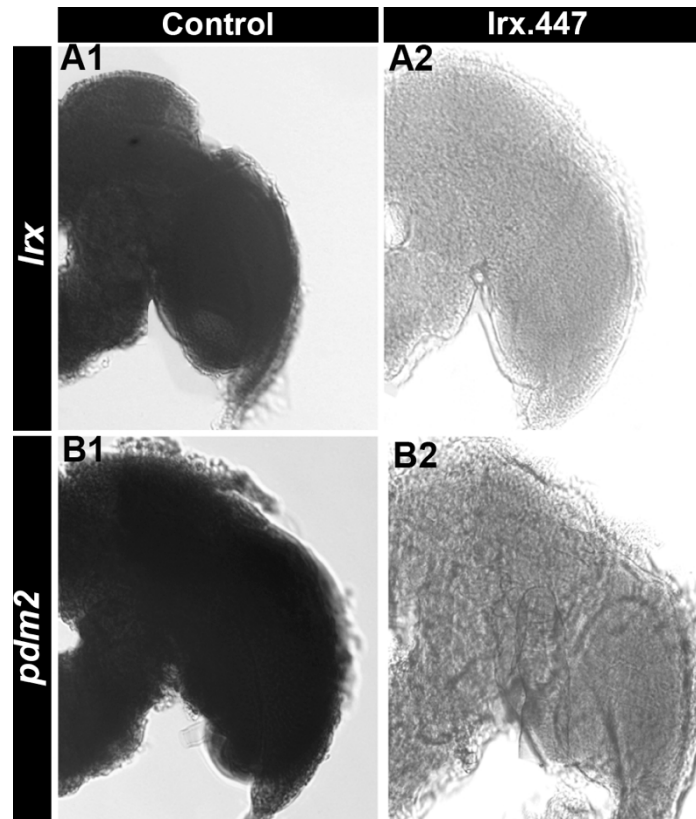

**Figure S1.** *Irx.447* yeast ATSB induces target gene silencing and decreased *pdm2* expression in *A. aegypti*. Consumption of *Irx.447* yeast ATSB (**A2,B2**) resulted in a significant loss of *Irx* (**A2**) and *pdm2* (**B2**) transcripts in the adult female *A. aegypti* brain (compare to control-treated female brains in **A1** and **B1**).

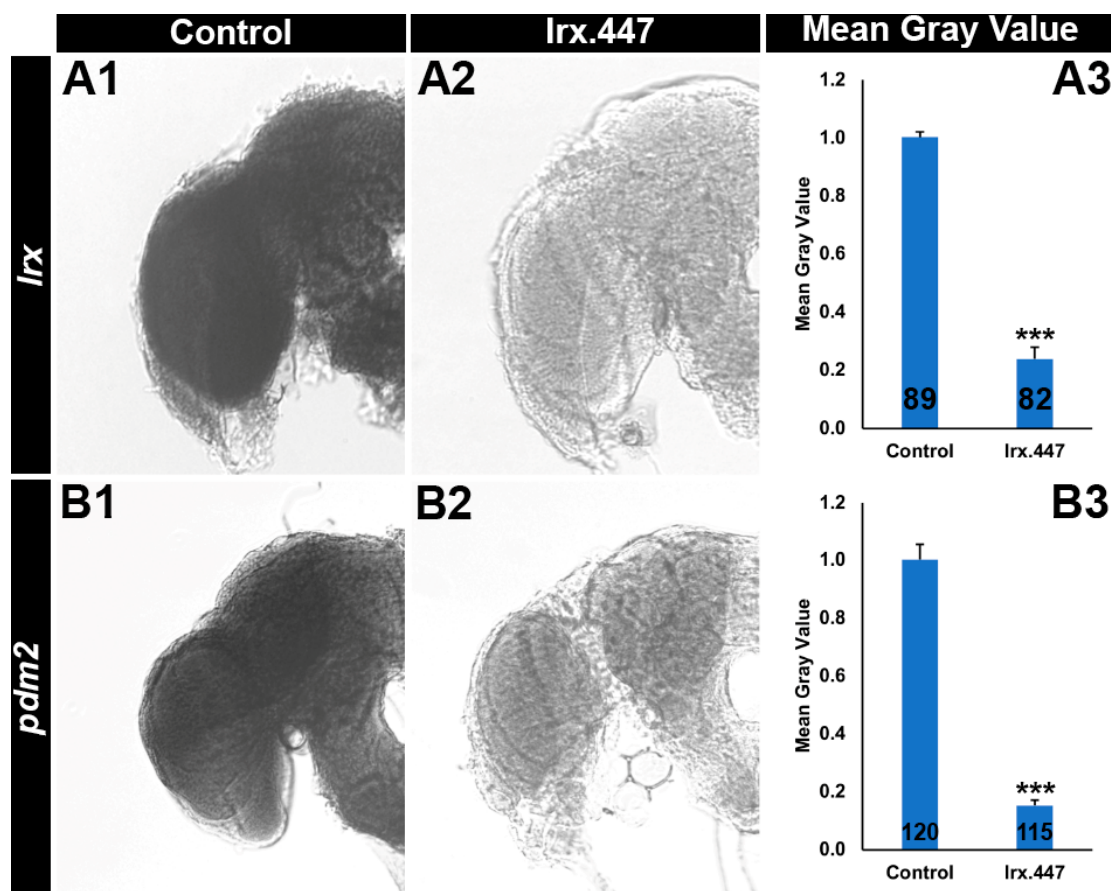

**Figure S2.** *Irx.447* yeast ATSB results in target gene silencing and significantly impacts *pdm2* expression in *A. gambiae*. Consumption of *Irx.447* yeast ATSB resulted in a significant reduction in *Irx* (A2,A3) and *pdm2* (B2,B3) transcripts in the adult female *A. gambiae* brain (compare to control-treated female brains in A1 and B1), as evidenced by mean gray value analyses (A3,B3). The numbers of brains analyzed (*n*) are specified below each bar in the graphs; \*\*\* = *p* < 0.001 vs. control (Student's *t*-test).

## References

47. Sayers, E.W.; Beck, J.; Bolton, E.E.; Bourexis, D.; Brister, J.R.; Canese, K.; Comeau, D.C.; Funk, K.; Kim, S.; Klimke, W.; et al. Database resources of the national center for biotechnology information. *Nucleic Acids Res.* **2021**, *49*, D10–D17. <https://doi.org/10.1093/nar/gkaa892>.
